# Supplementary material for: Synthesis of AgN5 and its extended 3D energetic framework
Source: PubMed Central journal article supplement (PMC5871778; doi:10.1038/s41467-018-03678-y), 2018-03-28
Supplement: 41467_2018_3678_MOESM1_ESM.pdf [file 41467_2018_3678_MOESM1_ESM.pdf]

# **Synthesis of AgN<sub>5</sub> and its extended 3D energetic framework**

Chengguo Sun et al.

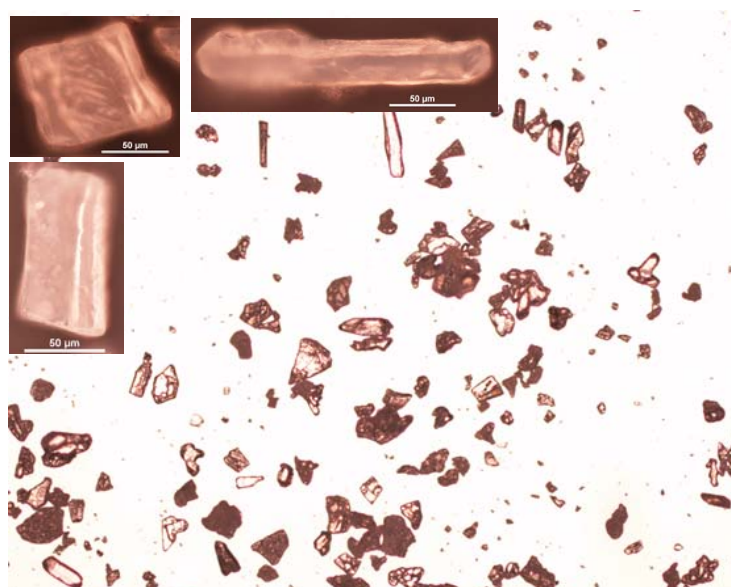

**Supplementary Figure 1 | Optical photographs of  $[\text{Ag}(\text{NH}_3)_2]^+[\text{Ag}_3(\text{N}_5)_4]^-$  crystals.**  
Three crystals are enlarged for illustration.

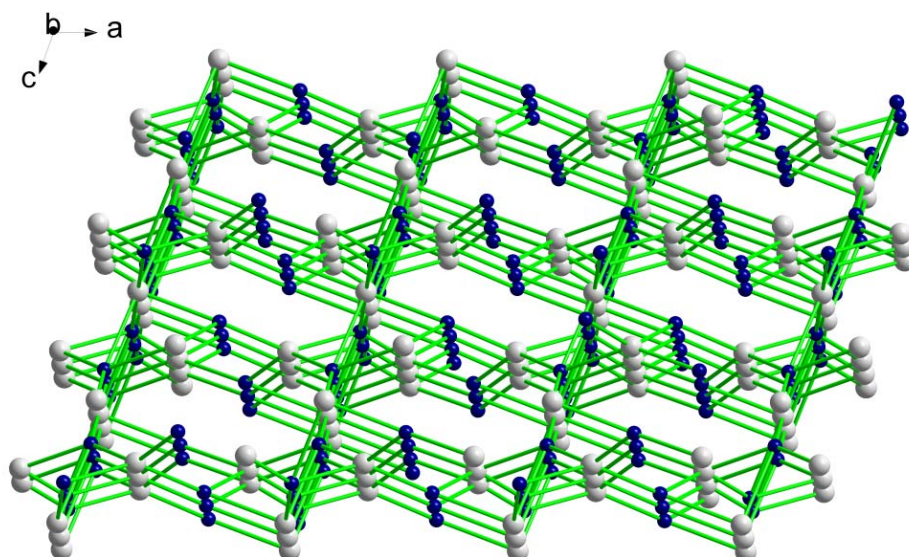

**Supplementary Figure 2 | Topological representation of the 3D framework in  $[\text{Ag}(\text{NH}_3)_2]^+[\text{Ag}_3(\text{N}_5)_4]^-$ .**

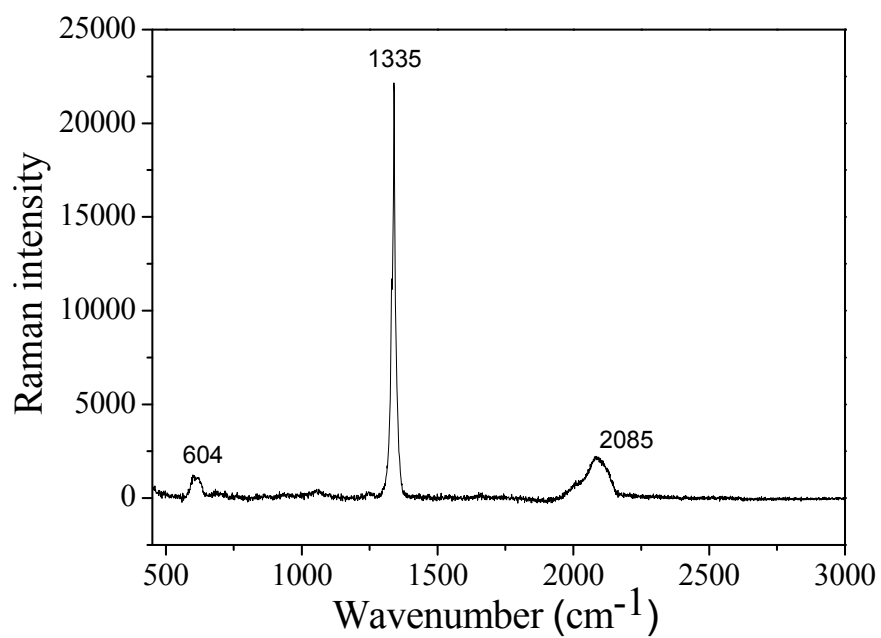

**Supplementary Figure 3 | Raman spectrum of an AgN<sub>3</sub> reference sample.**

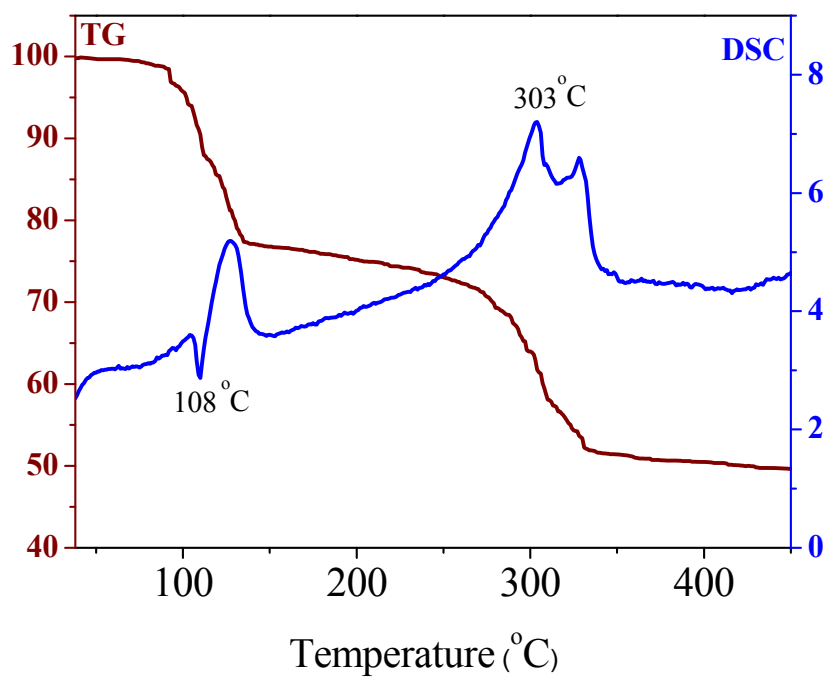

**Supplementary Figure 4 | TG-DSC curves of  $[\text{Ag}(\text{NH}_3)_2]^+[\text{Ag}_3(\text{N}_5)_4]^-$  under an argon atmosphere at 5 K/min.**

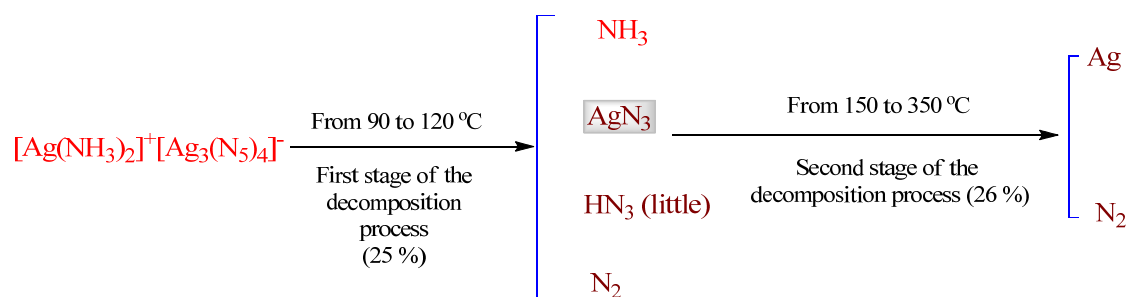

**Supplementary Figure 5 | The proposed thermal decomposition process of  $[\text{Ag}(\text{NH}_3)_2]^+[\text{Ag}_3(\text{N}_5)_4]^-$ .**

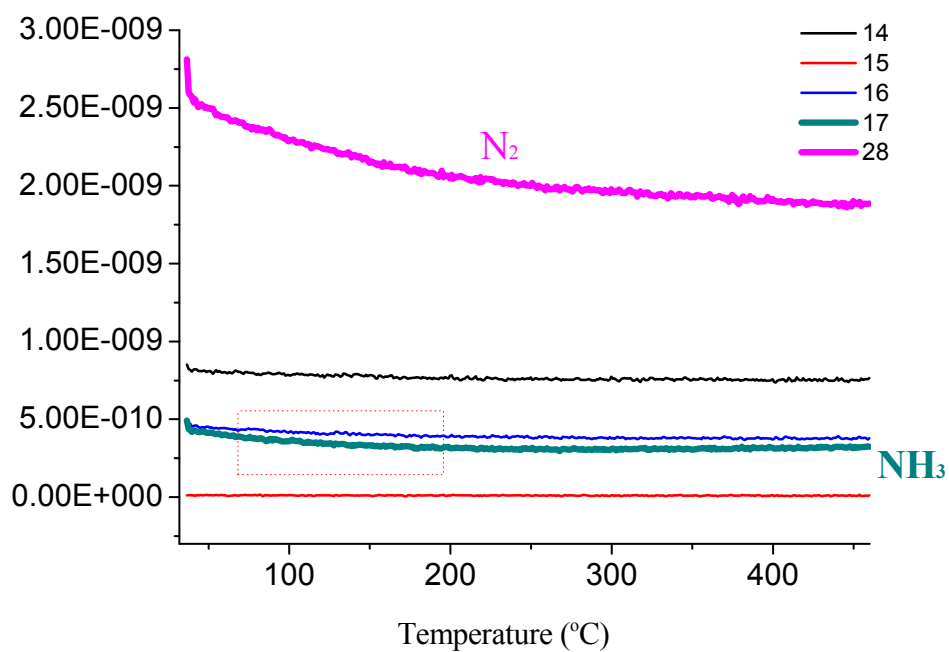

**Supplementary Figure 6 | The mass spectra of selected ion monitoring scan of the gas products obtained from the thermal decomposition of  $[\text{Ag}(\text{NH}_3)_2]^+[\text{Ag}_3(\text{N}_5)_4]^-$  under argon.**

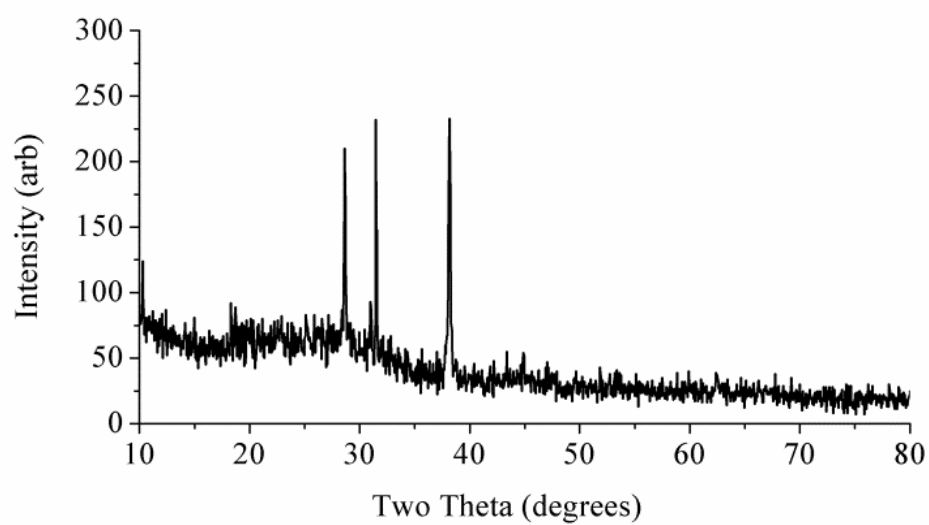

**Supplementary Figure 7 | The XRD powder pattern of  $[\text{Ag}(\text{NH}_3)_2]^+[\text{Ag}_3(\text{N}_5)_4]^-$  before thermal decomposition.**



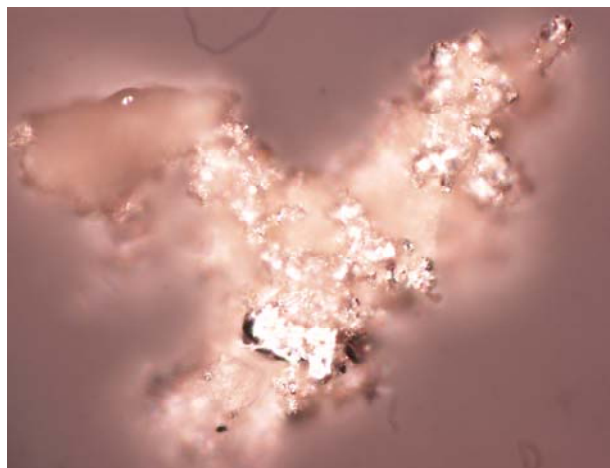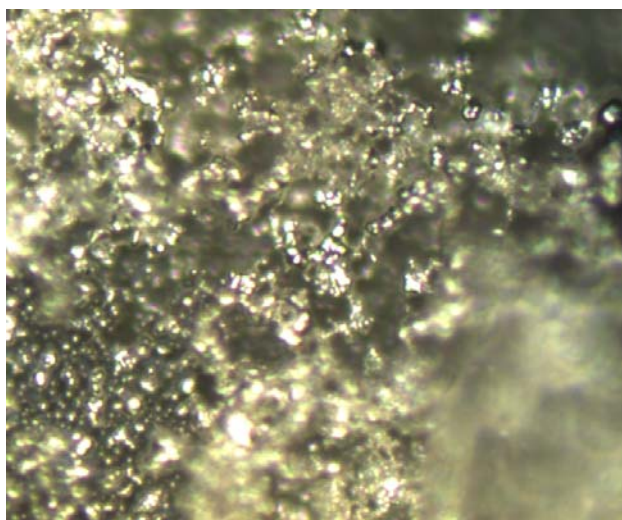

**Supplementary Figure 8 | Optical photographs of the thermal-decomposition residues of  $[\text{Ag}(\text{NH}_3)_2]^+[\text{Ag}_3(\text{N}_5)_4]^-$ .**

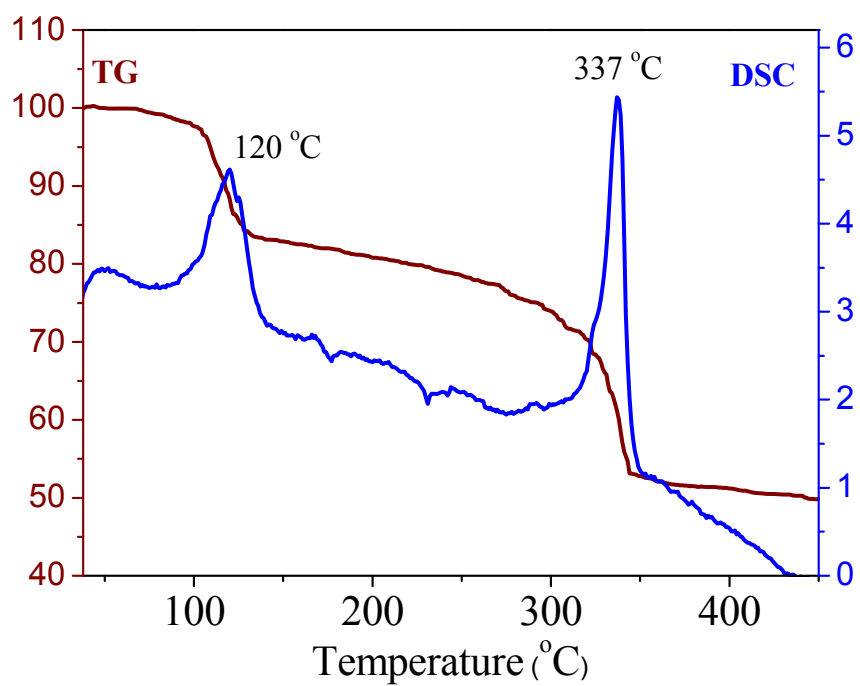

**Supplementary Figure 9 | TG-DSC curves of the  $\text{AgN}_3$  complex under an argon atmosphere at 5 K/min.**

**Supplementary Table 1 | The impact sensitivity Friction sensitivity of [Ag(NH<sub>3</sub>)<sub>2</sub>]<sup>+</sup>[Ag<sub>3</sub>(N<sub>5</sub>)<sub>4</sub>]<sup>-</sup> and comparison with Nano-CL-20, HMX and RDX**

| Sample                                                                                                                                                                                                                                                                                                                                                                                                               | [Ag(NH <sub>3</sub> ) <sub>2</sub> ] <sup>+</sup> [Ag <sub>3</sub> (N <sub>5</sub> ) <sub>4</sub> ] <sup>-</sup> | Nano CL-20 <sup>c</sup> | RDX (5-class) <sup>d</sup> | spherical β-HMX <sup>e</sup> |
|----------------------------------------------------------------------------------------------------------------------------------------------------------------------------------------------------------------------------------------------------------------------------------------------------------------------------------------------------------------------------------------------------------------------|------------------------------------------------------------------------------------------------------------------|-------------------------|----------------------------|------------------------------|
| <i>H</i> <sub>50</sub> value (cm)                                                                                                                                                                                                                                                                                                                                                                                    | 73.8 <sup>a</sup>                                                                                                | 29.4                    | 21.8                       | 54.1                         |
| Explosive probability<br>P (%)=76                                                                                                                                                                                                                                                                                                                                                                                    | 76 <sup>b</sup>                                                                                                  | 66                      | 80                         | 80                           |
| <sup>a</sup> : Testing Conditions. Test temperature: 24 °C, Relative humidity: 60%, Hammer weight: 2.0 kg.<br><sup>b</sup> Testing Conditions. Friction instrument: BM-B 20Z126, Test temperature: 24 °C, Relative humidity: 60%, Sample weight :20mg, Pressure: 2.45 Mpa; Angle: 66°.<br><sup>c</sup> Supplementary Reference 1<br><sup>d</sup> Supplementary Reference 2<br><sup>e</sup> Supplementary Reference 3 |                                                                                                                  |                         |                            |                              |

**Supplementary Table 2 | Crystallographic data for [Ag(NH<sub>3</sub>)<sub>2</sub>]<sup>+</sup>[Ag<sub>3</sub>(N<sub>5</sub>)<sub>4</sub>]<sup>-</sup>**

| Ag <sub>4</sub> H <sub>6</sub> N <sub>22</sub> |                                                                                                                             |
|------------------------------------------------|-----------------------------------------------------------------------------------------------------------------------------|
| Formula                                        | [Ag(NH <sub>3</sub> ) <sub>2</sub> ] <sup>+</sup> [Ag <sub>3</sub> (N <sub>5</sub> ) <sub>4</sub> ] <sup>-</sup>            |
| Formula weight                                 | 745.75 g·mol <sup>-1</sup>                                                                                                  |
| Temperature                                    | 123.15 K                                                                                                                    |
| Wavelength                                     | 0.71073 Å                                                                                                                   |
| Crystal system                                 | Monoclinic                                                                                                                  |
| Space group                                    | <i>P</i> 2 <sub>1</sub> / <i>c</i>                                                                                          |
| Cell parameters                                | <i>a</i> = 9.1248(18) Å <i>b</i> = 9.1238(18) Å <i>c</i> =9.8307(19) Å<br><i>α</i> =90° <i>β</i> =108.963(5)° <i>γ</i> =90° |
| Cell volume                                    | 774.0(3) Å <sup>3</sup>                                                                                                     |
| Formula Z                                      | 2                                                                                                                           |
| Calc. density                                  | 3.200 g·cm <sup>-3</sup>                                                                                                    |
| Absorption coefficient                         | 5.032 mm <sup>-1</sup>                                                                                                      |
| F(000)                                         | 696                                                                                                                         |
| Crystal size                                   | 0.22 × 0.25 × 0.26 mm                                                                                                       |
| Theta range for data collection                | 2.360 to 26.366°                                                                                                            |
| Limiting indices                               | -11 ≤ <i>h</i> ≤ 11, -11 ≤ <i>k</i> ≤ 10, -12 ≤ <i>l</i> ≤ 12                                                               |
| Reflections collected / unique                 | 5590/1554 [R(int) = 0.0468]                                                                                                 |
| Absorption correction                          | Semi-empirical from equivalents                                                                                             |
| Max. and min. transmission                     | 0.7457 and 0.5708                                                                                                           |
| Refinement method                              | Full-matrix least-squares on <i>F</i> <sup>2</sup>                                                                          |
| Goodness-of-fit on <i>F</i> <sup>2</sup>       | 1.142                                                                                                                       |
| Final R indices [ <i>I</i> > 2σ( <i>I</i> )]   | <i>R</i> <sub>1</sub> = 0.0310, <i>wR</i> <sub>2</sub> = 0.0799                                                             |
| R indices (all data)                           | <i>R</i> <sub>1</sub> = 0.0333, <i>wR</i> <sub>2</sub> = 0.0817                                                             |
| Largest diff. peak and hole                    | 0.648 and -1.243 e <sup>-</sup> ·Å <sup>-3</sup>                                                                            |
| CSD                                            | 433114                                                                                                                      |

**Supplementary Table 3 | Bond lengths.**

| parameter                 | bond length(Å) | parameter                 | bond length(Å) |
|---------------------------|----------------|---------------------------|----------------|
| Ag(1)-N(3)                | 2.375(3)       | N(2)-N(3)                 | 1.323(4)       |
| Ag(1)-N(3) <sup>#1</sup>  | 2.375(3)       | N(3)-N(4)                 | 1.330(4)       |
| Ag(1)-N(7) <sup>#2</sup>  | 2.513(3)       | N(4)-Ag(2) <sup>#4</sup>  | 2.370(3)       |
| Ag(1)-N(7) <sup>#3</sup>  | 2.513(3)       | N(4)-N(5)                 | 1.323(4)       |
| Ag(1)-N(10) <sup>#4</sup> | 2.669(3)       | N(6)-N(7)                 | 1.327(4)       |
| Ag(1)-N(10) <sup>#5</sup> | 2.669(3)       | N(6)-N(10)                | 1.330(4)       |
| Ag(3)-N(11)               | 2.110(3)       | N(7)-Ag(1) <sup>#9</sup>  | 2.513(3)       |
| Ag(3)-N(11) <sup>#6</sup> | 2.110(3)       | N(7)-N(8)                 | 1.320(4)       |
| Ag(2)-N(1)                | 2.332(3)       | N(8)-N(9)                 | 1.318(4)       |
| Ag(2)-N(4) <sup>#7</sup>  | 2.370(3)       | N(9)-Ag(2) <sup>#10</sup> | 2.365(3)       |
| Ag(2)-N(6)                | 2.336(3)       | N(9)-N(10)                | 1.328(4)       |
| Ag(2)-N(9) <sup>#8</sup>  | 2.365(3)       | N(11)-H(11A)              | 0.9100         |
| N(1)-N(2)                 | 1.327(4)       | N(11)-H(11B)              | 0.9100         |
| N(1)-N(5)                 | 1.336(4)       | N(11)-H(11C)              | 0.9100         |

Symmetry code: #1: -x+2, -y+1, -z+1 #2: -x+1, -y+1, -z+1 #3: x+1, y, z #4: -x+1, y-1/2, -z+1/2 #5: x+1, -y+3/2, z+1/2 #6: -x+1, -y+2, -z+1 #7: -x+1, y+1/2, -z+1/2 #8: -x, y-1/2, -z+1/2 #9: x-1, y, z #10: -x, y+1/2, -z+1/2.

**Supplementary Table 4 | Bond angles.**

| parameter                                      | bond angle(°) | parameter                       | bond angle(°) |
|------------------------------------------------|---------------|---------------------------------|---------------|
| N(3)-Ag(1)-N(3) <sup>#1</sup>                  | 180.0         | N(3)-N(2)-N(1)                  | 107.2(3)      |
| N(3) <sup>#1</sup> -Ag(1)-N(7) <sup>#3</sup>   | 85.55(9)      | N(2)-N(3)-Ag(1)                 | 125.8(2)      |
| N(3)-Ag(1)-N(7) <sup>#3</sup>                  | 94.45(9)      | N(2)-N(3)-N(4)                  | 108.4(2)      |
| N(3) <sup>#1</sup> -Ag(1)-N(7) <sup>#2</sup>   | 94.45(9)      | N(4)-N(3)-Ag(1)                 | 125.3(2)      |
| N(3)-Ag(1)-N(7) <sup>#2</sup>                  | 85.55(9)      | N(3)-N(4)-Ag(2) <sup>#4</sup>   | 124.62(19)    |
| N(3)-Ag(1)-N(10) <sup>#4</sup>                 | 86.51(9)      | N(5)-N(4)-Ag(2) <sup>#4</sup>   | 121.1(2)      |
| N(3) <sup>#1</sup> -Ag(1)-N(10) <sup>#5</sup>  | 86.50(9)      | N(5)-N(4)-N(3)                  | 108.6(3)      |
| N(3) <sup>#1</sup> -Ag(1)-N(10) <sup>#4</sup>  | 93.50(9)      | N(4)-N(5)-N(1)                  | 106.8(3)      |
| N(3)-Ag(1)-N(10) <sup>#5</sup>                 | 93.49(9)      | N(7)-N(6)-Ag(2)                 | 128.6(2)      |
| N(7) <sup>#2</sup> -Ag(1)-N(7) <sup>#3</sup>   | 180.0         | N(7)-N(6)-N(10)                 | 107.7(2)      |
| N(7) <sup>#2</sup> -Ag(1)-N(10) <sup>#5</sup>  | 85.18(9)      | N(10)-N(6)-Ag(2)                | 122.8(2)      |
| N(7) <sup>#3</sup> -Ag(1)-N(10) <sup>#5</sup>  | 94.82(9)      | N(6)-N(7)-Ag(1) <sup>#9</sup>   | 123.4(2)      |
| N(7) <sup>#2</sup> -Ag(1)-N(10) <sup>#4</sup>  | 94.82(9)      | N(8)-N(7)-Ag(1) <sup>#9</sup>   | 123.8(2)      |
| N(7) <sup>#3</sup> -Ag(1)-N(10) <sup>#4</sup>  | 85.18(9)      | N(8)-N(7)-N(6)                  | 108.7(3)      |
| N(10) <sup>#4</sup> -Ag(1)-N(10) <sup>#5</sup> | 180.0         | N(9)-N(8)-N(7)                  | 107.4(2)      |
| N(11)-Ag(3)-N(11) <sup>#6</sup>                | 180.00(13)    | N(8)-N(9)-Ag(2) <sup>#10</sup>  | 128.4(2)      |
| N(1)-Ag(2)-N(4) <sup>#7</sup>                  | 97.19(9)      | N(8)-N(9)-N(10)                 | 109.0(3)      |
| N(1)-Ag(2)-N(6)                                | 141.14(9)     | N(10)-N(9)-Ag(2) <sup>#10</sup> | 122.6(2)      |
| N(1)-Ag(2)-N(9) <sup>#8</sup>                  | 93.97(9)      | N(9)-N(10)-N(6)                 | 107.2(3)      |
| N(6)-Ag(2)-N(4) <sup>#7</sup>                  | 99.67(9)      | Ag(3)-N(11)-H(11A)              | 109.5         |
| N(6)-Ag(2)-N(9) <sup>#8</sup>                  | 95.60(10)     | Ag(3)-N(11)-H(11B)              | 109.5         |
| N(9) <sup>#8</sup> -Ag(2)-N(4) <sup>#7</sup>   | 139.30(9)     | Ag(3)-N(11)-H(11C)              | 109.5         |
| N(2)-N(1)-Ag(2)                                | 128.2(2)      | H(11A)-N(11)-H(11B)             | 109.5         |
| N(2)-N(1)-N(5)                                 | 109.0(2)      | H(11A)-N(11)-H(11C)             | 109.5         |
| N(5)-N(1)-Ag(2)                                | 121.9(2)      | H(11B)-N(11)-H(11C)             | 109.5         |

Symmetry code: #1: -x+2, -y+1, -z+1 #2: -x+1, -y+1, -z+1 #3: x+1, y, z #4: -x+1, y-1/2, -z+1/2 #5: x+1, -y+3/2, z+1/2 #6: -x+1, -y+2, -z+1 #7: -x+1, y+1/2, -z+1/2 #8: -x, y-1/2, -z+1/2 #9: x-1, y, z #10: -x, y+1/2, -z+1/2.

**Supplementary Table 5 | Hydrogen bonds for [Ag(NH<sub>3</sub>)<sub>2</sub>]<sup>+</sup>[Ag<sub>3</sub>(N<sub>5</sub>)<sub>4</sub>]<sup>-</sup>.**

| D-H...A                            | D-H(Å) | H...A(Å) | D...A(Å) | D-H...A(°) |
|------------------------------------|--------|----------|----------|------------|
| N(11)-H(11A)...N(2)                | 0.91   | 2.50     | 3.079(4) | 122.1      |
| N(11)-H(11A)...N(8) <sup>#3</sup>  | 0.91   | 2.31     | 3.112(4) | 146.6      |
| N(11)-H(11B)...N(5) <sup>#2</sup>  | 0.91   | 2.27     | 3.152(4) | 162.1      |
| N(11)-H(11C)...N(3) <sup>#11</sup> | 0.91   | 2.69     | 3.289(4) | 124.2      |
| N(11)-H(11C)...N(10) <sup>#6</sup> | 0.91   | 2.44     | 3.257(4) | 148.7      |

Symmetry code: #1: -x+2, -y+1, -z+1 #2: -x+1, -y+1, -z+1 #3: x+1, y, z #4: -x+1, y-1/2, -z+1/2 #5: x+1, -y+3/2, z+1/2 #6: -x+1, -y+2, -z+1 #7: -x+1, y+1/2, -z+1/2 #8: -x, y-1/2, -z+1/2 #9: x-1, y, z #10: -x, y+1/2, -z+1/2 #11: x, -y+3/2, z+1/2.

**Supplementary Table 6 | Torsion angles.**

| parameter                             | torsion angle(°) | parameter                           | torsion angle(°) |
|---------------------------------------|------------------|-------------------------------------|------------------|
| Ag(1)-N(3)-N(4)-Ag(2) <sup>#4</sup>   | -18.9(3)         | N(2)-N(1)-N(5)-N(4)                 | 0.0(3)           |
| Ag(1)-N(3)-N(4)-N(5)                  | -172.3(2)        | N(2)-N(3)-N(4)-Ag(2) <sup>#4</sup>  | 153.5(2)         |
| Ag(1) <sup>#9</sup> -N(7)-N(8)-N(9)   | -158.2(2)        | N(2)-N(3)-N(4)-N(5)                 | 0.0(3)           |
| Ag(2)-N(1)-N(2)-N(3)                  | -168.9(2)        | N(3)-N(4)-N(5)-N(1)                 | 0.0(3)           |
| Ag(2)-N(1)-N(5)-N(4)                  | 169.74(18)       | N(5)-N(1)-N(2)-N(3)                 | 0.0(3)           |
| Ag(2) <sup>#4</sup> -N(4)-N(5)-N(1)   | -154.6(2)        | N(6)-N(7)-N(8)-N(9)                 | -0.3(4)          |
| Ag(2)-N(6)-N(7)-Ag(1) <sup>#9</sup>   | -10.5(4)         | N(7)-N(6)-N(10)-N(9)                | -0.4(4)          |
| Ag(2)-N(6)-N(7)-N(8)                  | -168.5(2)        | N(7)-N(8)-N(9)-Ag(2) <sup>#10</sup> | -179.4(2)        |
| Ag(2)-N(6)-N(10)-N(9)                 | 169.3(2)         | N(7)-N(8)-N(9)-N(10)                | 0.1(4)           |
| Ag(2) <sup>#10</sup> -N(9)-N(10)-N(6) | 179.7(2)         | N(8)-N(9)-N(10)-N(6)                | 0.2(4)           |
| N(1)-N(2)-N(3)-Ag(1)                  | 172.25(19)       | N(10)-N(6)-N(7)-Ag(1) <sup>#9</sup> | 158.5(2)         |
| N(1)-N(2)-N(3)-N(4)                   | 0.0(3)           | N(10)-N(6)-N(7)-N(8)                | 0.4(4)           |

Symmetry code: #1: -x+2, -y+1, -z+1 #2: -x+1, -y+1, -z+1 #3: x+1, y, z #4: -x+1, y-1/2, -z+1/2 #5: x+1, -y+3/2, z+1/2 #6: -x+1, -y+2, -z+1 #7: -x+1, y+1/2, -z+1/2 #8: -x, y-1/2, -z+1/2 #9: x-1, y, z #10: -x, y+1/2, -z+1/2.



### Supplementary References

1. Guo, X., Ouyang, G., Liu, J., Li, Q., Wang, L., Gu, Z., & Li, F. Massive preparation of reduced-sensitivity nano CL-20 and its characterization. *J. Energ. Mater.*, **33(1)**, 24-33 (2015).
2. Jiang, X., Guo, X., Ren, H., & Jiao, Q. Preparation and characterization of desensitized  $\epsilon$ -HNIW in solvent-antisolvent recrystallizations. *Cent. Eur. J. Energ. Mater.*, **9(3)**, 219-236 (2012).
3. Song, X., Wang, Y., An, C., Guo, X., & Li, F.. Dependence of particle morphology and size on the mechanical sensitivity and thermal stability of octahydro-1, 3, 5, 7-tetranitro-1, 3, 5, 7-tetrazocinCompeting interests: The authors declare no competing financial interests.e. *J. Hazard. Mater.*, **159(2-3)**, 222-229 (2008).
